# Supplementary material for: Visualizing Asymmetric Competition Among More Than 1,000 Products Using Big Search Data
Source: Atypon-hosted journal article supplement (doi:10.1287/mksc.2015.0950), 2016-05-01
Supplement: mksc.2015.0950-sm.pdf [file mksc.2015.0950-sm.pdf]

# Visualizing Asymmetric Competition among more than 1,000 Products using Big Search Data

**INFORMS Science to Practice Initiative**

*Based on: Ringel DM, Skiera B (2016) Visualizing Asymmetric Competition among more than 1,000 Products using Big Search Data. Marketing Science 35(3):511-534*

# Firms must Understand the Competitive Environment they Operate in

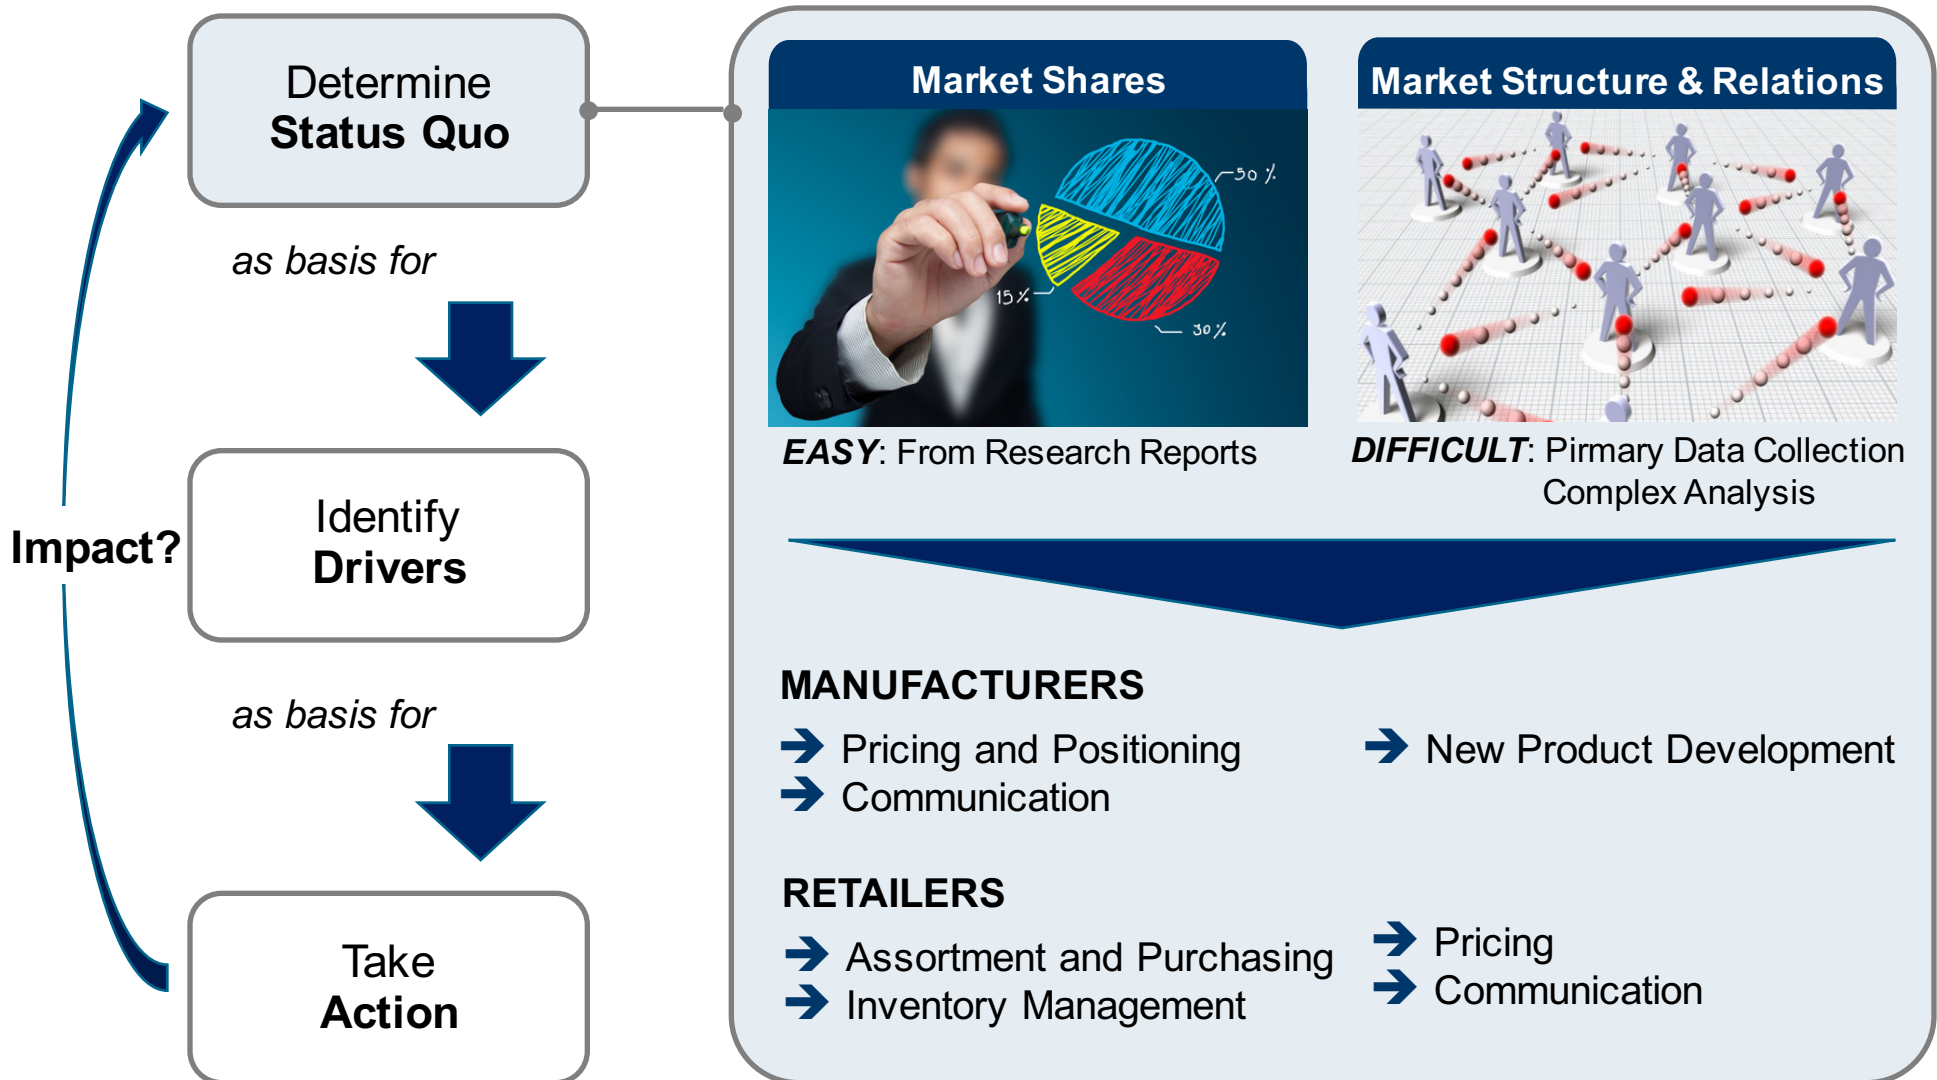

# Traditional Approach for Analyzing Competitive Market Structure: Perceptual Mapping

*A perceptual map is a visual representation of how consumers view competing alternatives in a Euclidean space which represents the market*

## 1 Collect Data

**Survey** consumers on how similar (dissimilar) they perceive pairs of products to be using a 7-point scale (1 very similar to 7 very different)

*Example: 4 products (A,B,C,D)*

| Products | Very similar |   |   |   | Very different |   |   |
|----------|--------------|---|---|---|----------------|---|---|
| A B      | 1            | 2 | 3 | 4 | 5              | 6 | 7 |
| A C      | 1            | 2 | 3 | 4 | 5              | 6 | 7 |
| .        |              |   |   |   |                |   |   |
| C D      | 1            | 2 | 3 | 4 | 5              | 6 | 7 |

*Ask each respondent:*

*$N \times (N-1) / 2$  pair-wise questions*

*$N=4: 4 \times (4-1) / 2 = 6$  questions*

**!** *Only feasible for markets with few products*

# Traditional Approach for Analyzing Competitive Market Structure: Perceptual Mapping

*A perceptual map is a visual representation of how consumers view competing alternatives in a Euclidean space which represents the market*

## 2 Visualize Competitive Market Structure

Use **Multidimensional Scaling (MDS)** to create a visual representation of competitive market structure based on consumers' perceptions

*Calculate mean ratings for all product pairs and transfer into a joint table of product dissimilarity*

|   | A   | B   | C   | D |
|---|-----|-----|-----|---|
| A |     |     |     |   |
| B | 4.2 |     |     |   |
| C | 1.9 | 2.3 |     |   |
| D | 2.3 | 2.7 | 4.9 |   |

The greater the value of a cell, the less similar the two products are

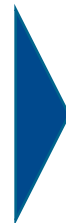

*Visualize using MDS (available in SPSS, STATA, SAS, R, etc.)*

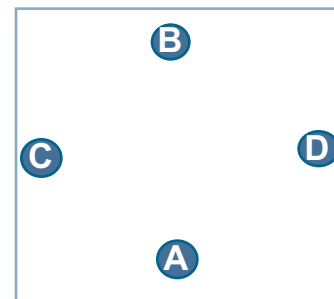

The greater the distance between two products, the less similar these two products are

```
MATLAB CODE for MDS
d=@(i,j) 4.2 1.9 2.3 4.2 0 2.3 2.7...
1.9 2.3 0.4 2.3 2.7 4.9 0;
c={'A','B','C','D'};
[Y=zeros(size(d,2));
distances = pdist(Y);
dx = 0.1; dy = 0.1;
scatter(Y(:,1),Y(:,2));
text(Y(:,1)+dx, Y(:,2)+dy, c);
```

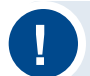

**As the number of products increases, MDS solution quality is known to deteriorate**

# Today's Durable Markets are Large

| Market*                | Brands | Products | HHI** | Largest Share | Mean Share | Brands in Top 50 |
|------------------------|--------|----------|-------|---------------|------------|------------------|
| Washing Machines       | 43     | 1,196    | 54    | 2.23%         | 0.08%      | 35%              |
| Vacuum Cleaners        | 96     | 1,514    | 65    | 3.01%         | 0.07%      | 13%              |
| Digital Cameras        | 48     | 920      | 98    | 3.98%         | 0.11%      | 21%              |
| Lawnmowers             | 33     | 518      | 140   | 5.18%         | 0.19%      | 24%              |
| Toasters               | 71     | 408      | 179   | 5.82%         | 0.25%      | 28%              |
| Smartphones            | 32     | 658      | 403   | 14.64%        | 0.15%      | 31%              |
| Espresso Machines      | 28     | 459      | 265   | 7.53%         | 0.22%      | 29%              |
| Car Navigation Systems | 52     | 670      | 333   | 8.43%         | 0.17%      | 7%               |

\* Source: GfK Retail Panel Germany September 2012

\*\* Herfindahl-Hirschman Index measures market concentration (1 to 10,000) HHI < 100 is highly competitive and <1,000 not concentrated

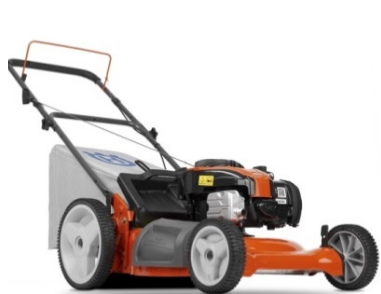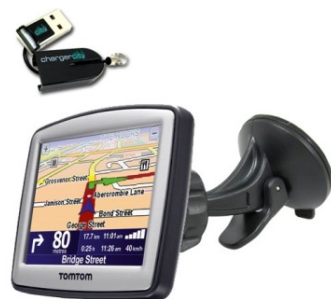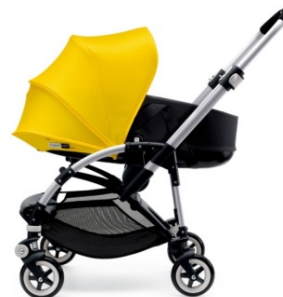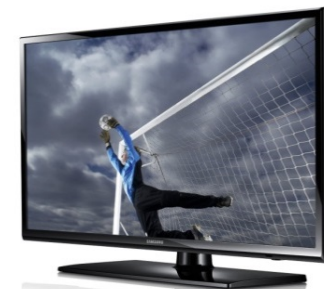

# Big Data Problem

## Relationship Matrices drawn to Scale

### Traditional Approaches for Visualizing Competitive Market Structure

**10 Products**

*DeSarbo & Grewal (2007)*

**62 Products**

*Kim et al. (2011)*

**169 Products**

*Netzer et al. (2012)*

**1,000 Products**

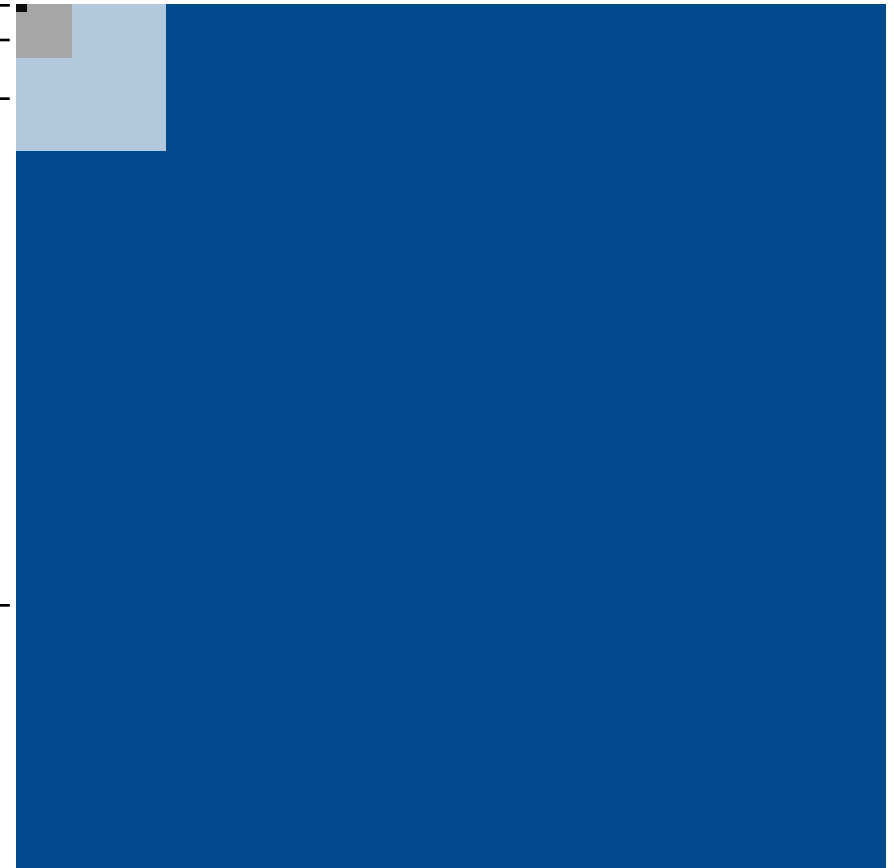

- ❓ How to collect data on over 1,000 products?
- ❓ How to process and analyze these data?
- ❓ How to visualize competitive market structure among over 1,000 products?

# New Idea: Leverage Online Search Data

Every day, Millions of Consumers **SEARCH & COMPARE** Products online

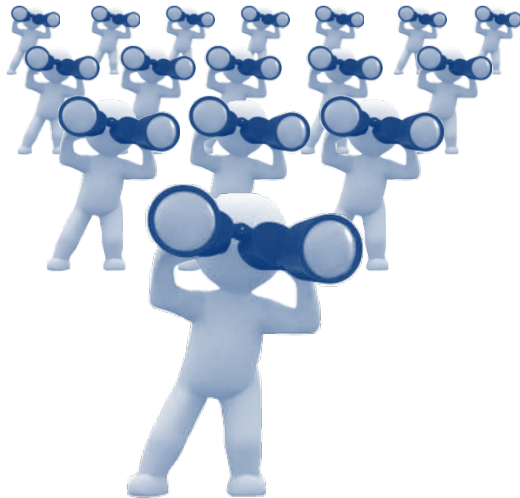

*What is searched a lot is bought a lot*

Search frequency as proxy for

**Market Share**

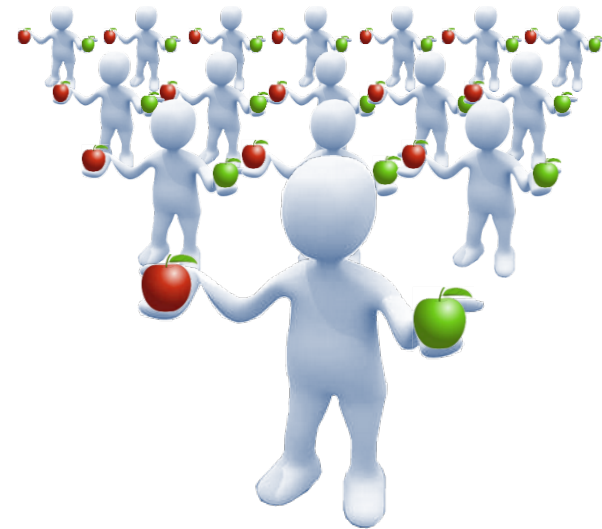

*Products searched together are substitutes*

Substitutes are very similar: Similarity as proxy for

**Competition**

# Consideration Sets as Arbiters for Competition

## Hierarchical Choice Model

*Shocker et al. (1991)*

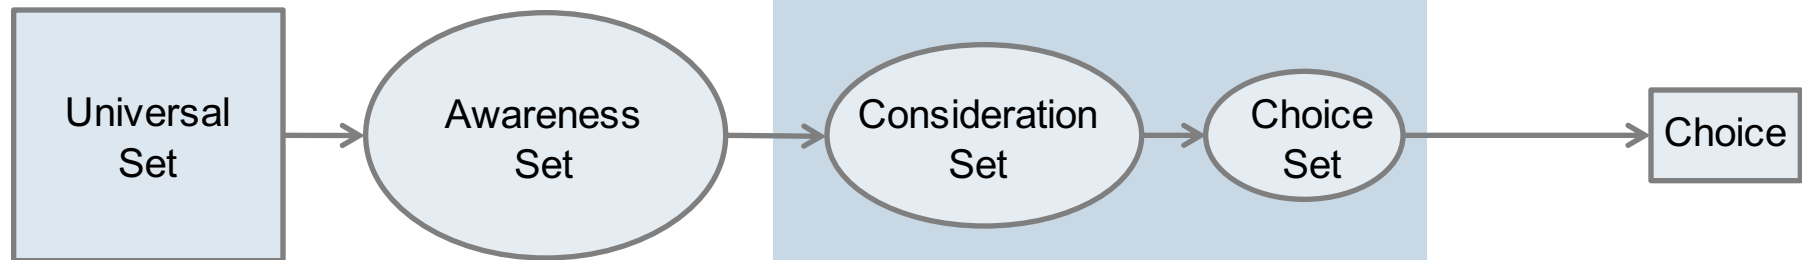

## Online search for products

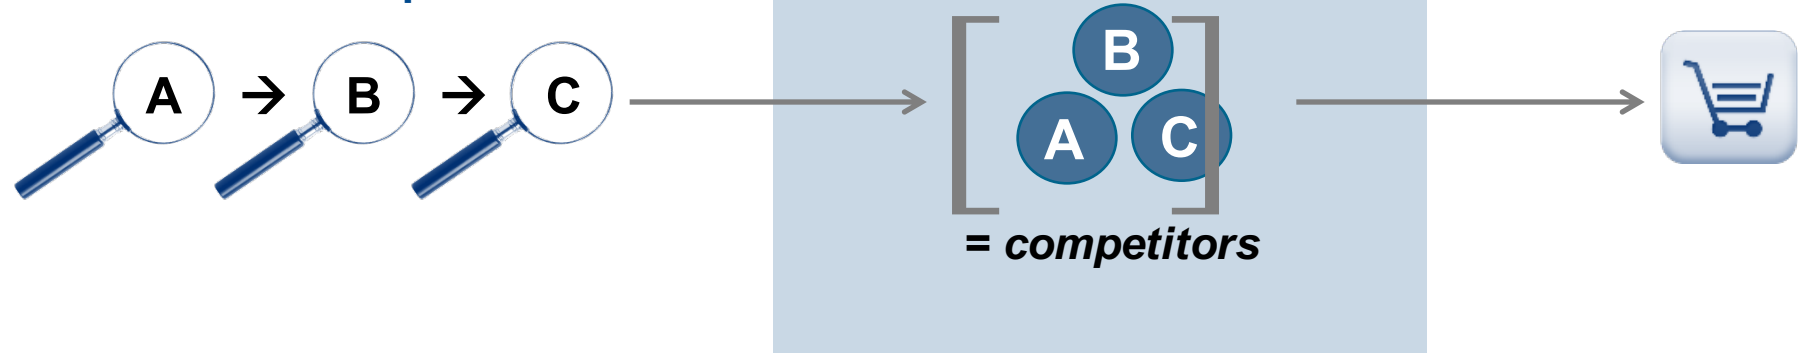

# Competition can be Asymmetric

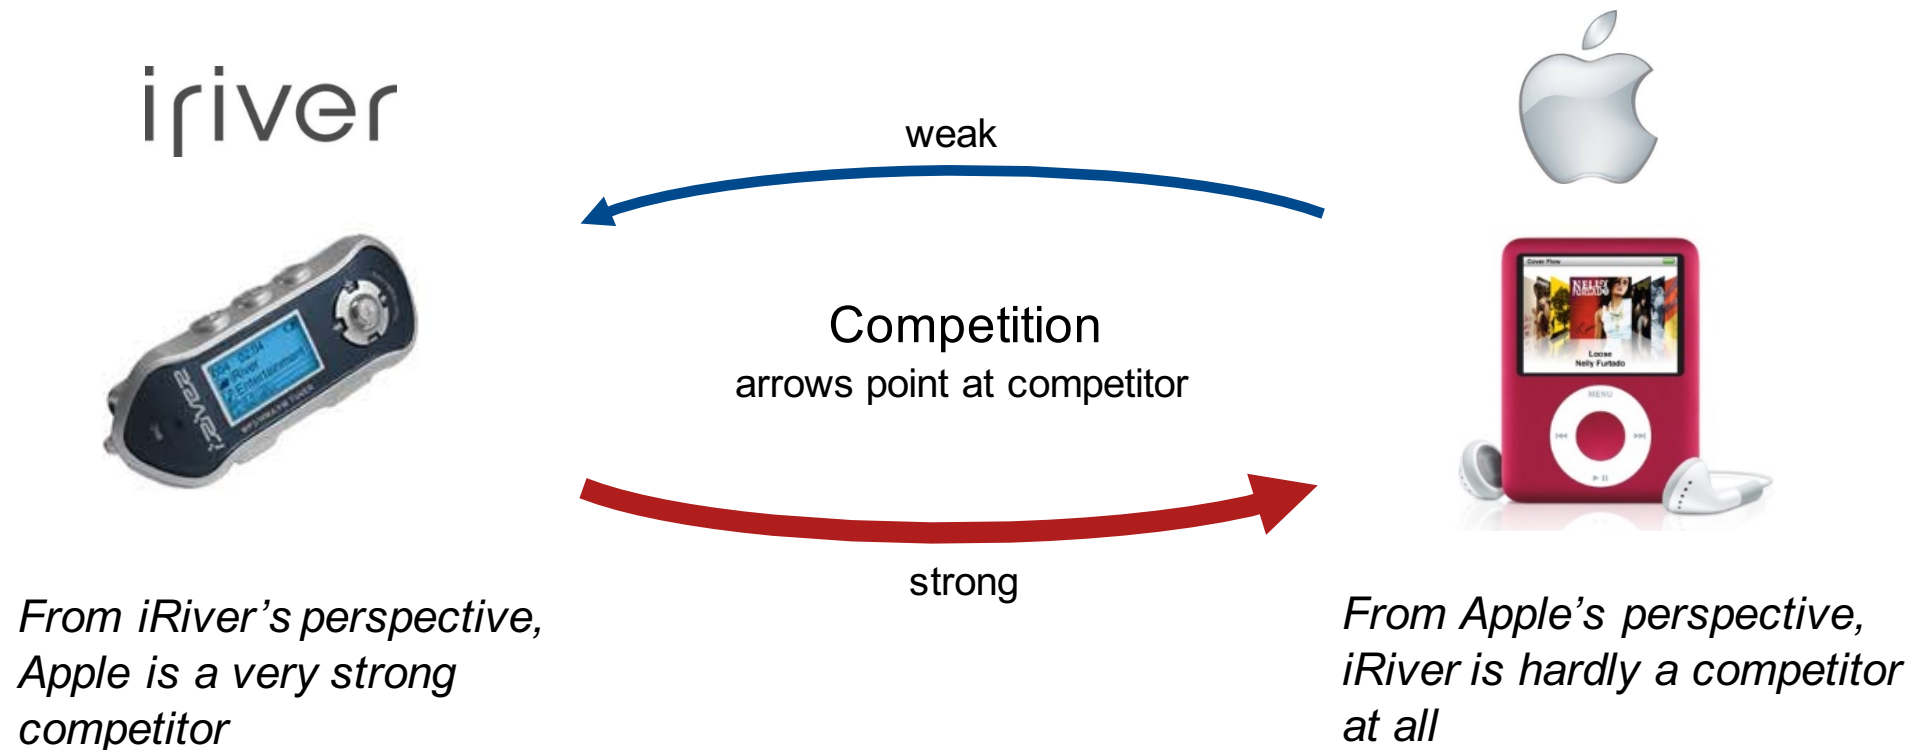

# Competitive Asymmetry among two Products can be Identified from Consideration Sets

Given:

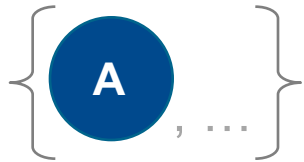

A is included in  
3 consideration sets

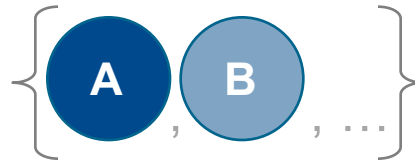

A and B are jointly included  
in 3 consideration sets

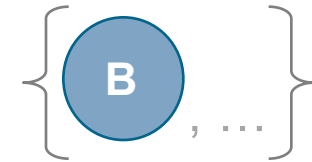

B is included in  
5 consideration sets

**Conditional probability:** What is the probability that A is considered, given that B is considered?

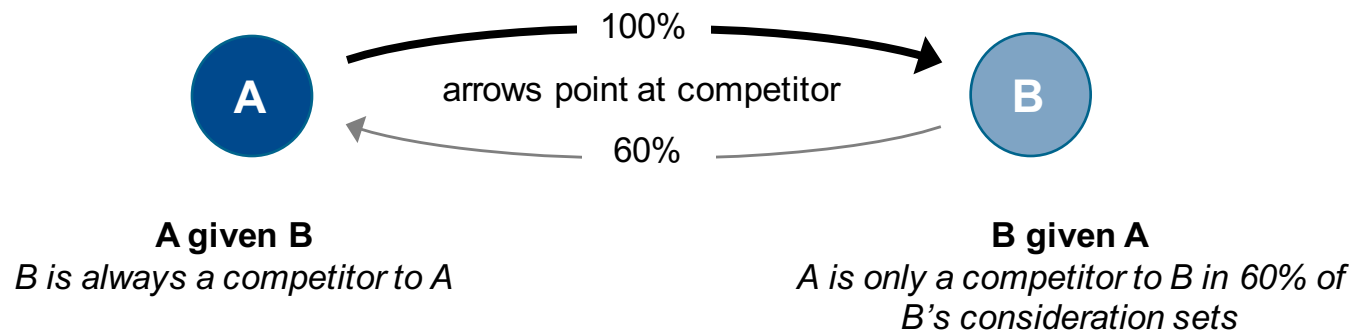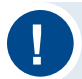

***B is a stronger competitor to A than vice versa***

# New Approach for Visualizing Competitive Market Structure among over 1,000 Products

## 1 Data

Collect Clickstreams from Price-Comparison Site

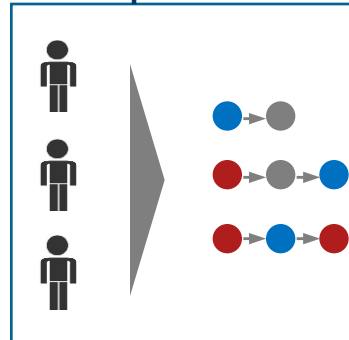

Construct Consideration Sets from Clickstreams

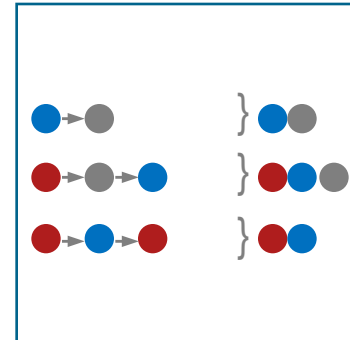

Build Matrix of Joint Consideration from Consideration Sets

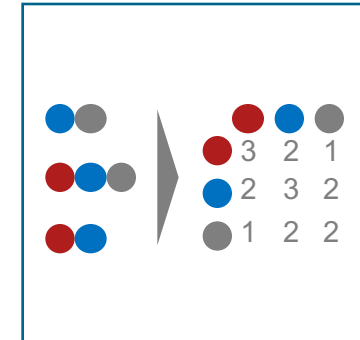

## 2 Analysis

Identify Competitive Asymmetry from Consideration Sets

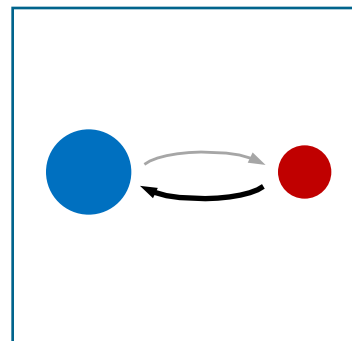

Visualize Competitive Market Structure with *DRMABS*\*

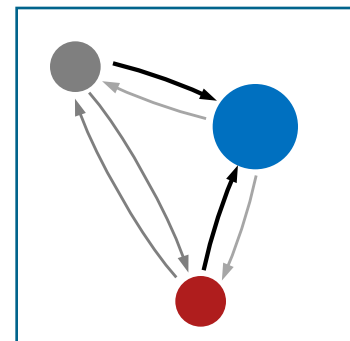

Investigate Market Structure using Attributes

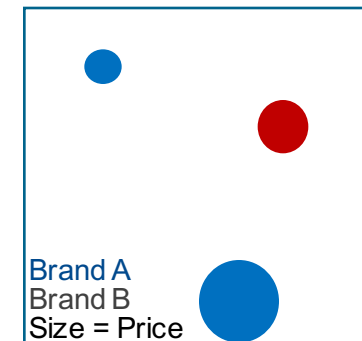

\* *DRMABS* (Decomposition and Re-assembly of **MA**rkets **B**y **S**egmentation) is a newly developed model to visualize asymmetric competitive market structure among hundreds of products in a single map whereby submarket structures are explicitly detected and visualized

# Empirical Application

## LED TV Market

|                                        |                                 |
|----------------------------------------|---------------------------------|
| <b>Data source:</b>                    | Product & Price Comparison Site |
| <b>Category:</b>                       | LED TVs                         |
| <b>Time:</b>                           | September 2012                  |
| <b>Country:</b>                        | Germany                         |
| <b>Observed consumers:</b>             | 105,606                         |
| <b>Brands:</b>                         | 56                              |
| <b>Products (SKUs):</b>                | 1,124                           |
| <b>Possible competitive relations:</b> | 1,262,252                       |

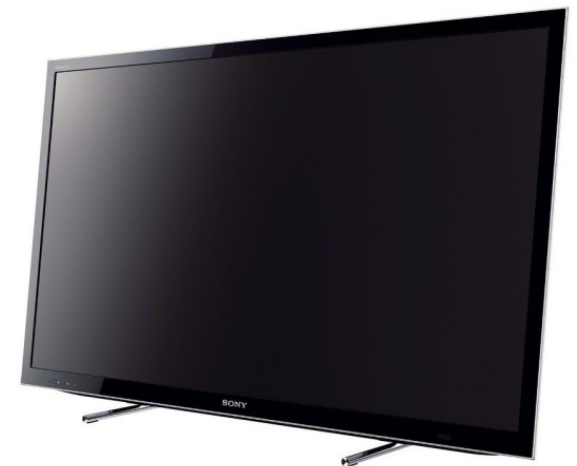

### Objectives

1. Analyze and visualize asymmetric competitive market structure
2. Validate Online Search Data
3. Compare new DRMABS mode to traditional mapping techniques

# Competitive Market Structure Map for 1,124 LED TVs

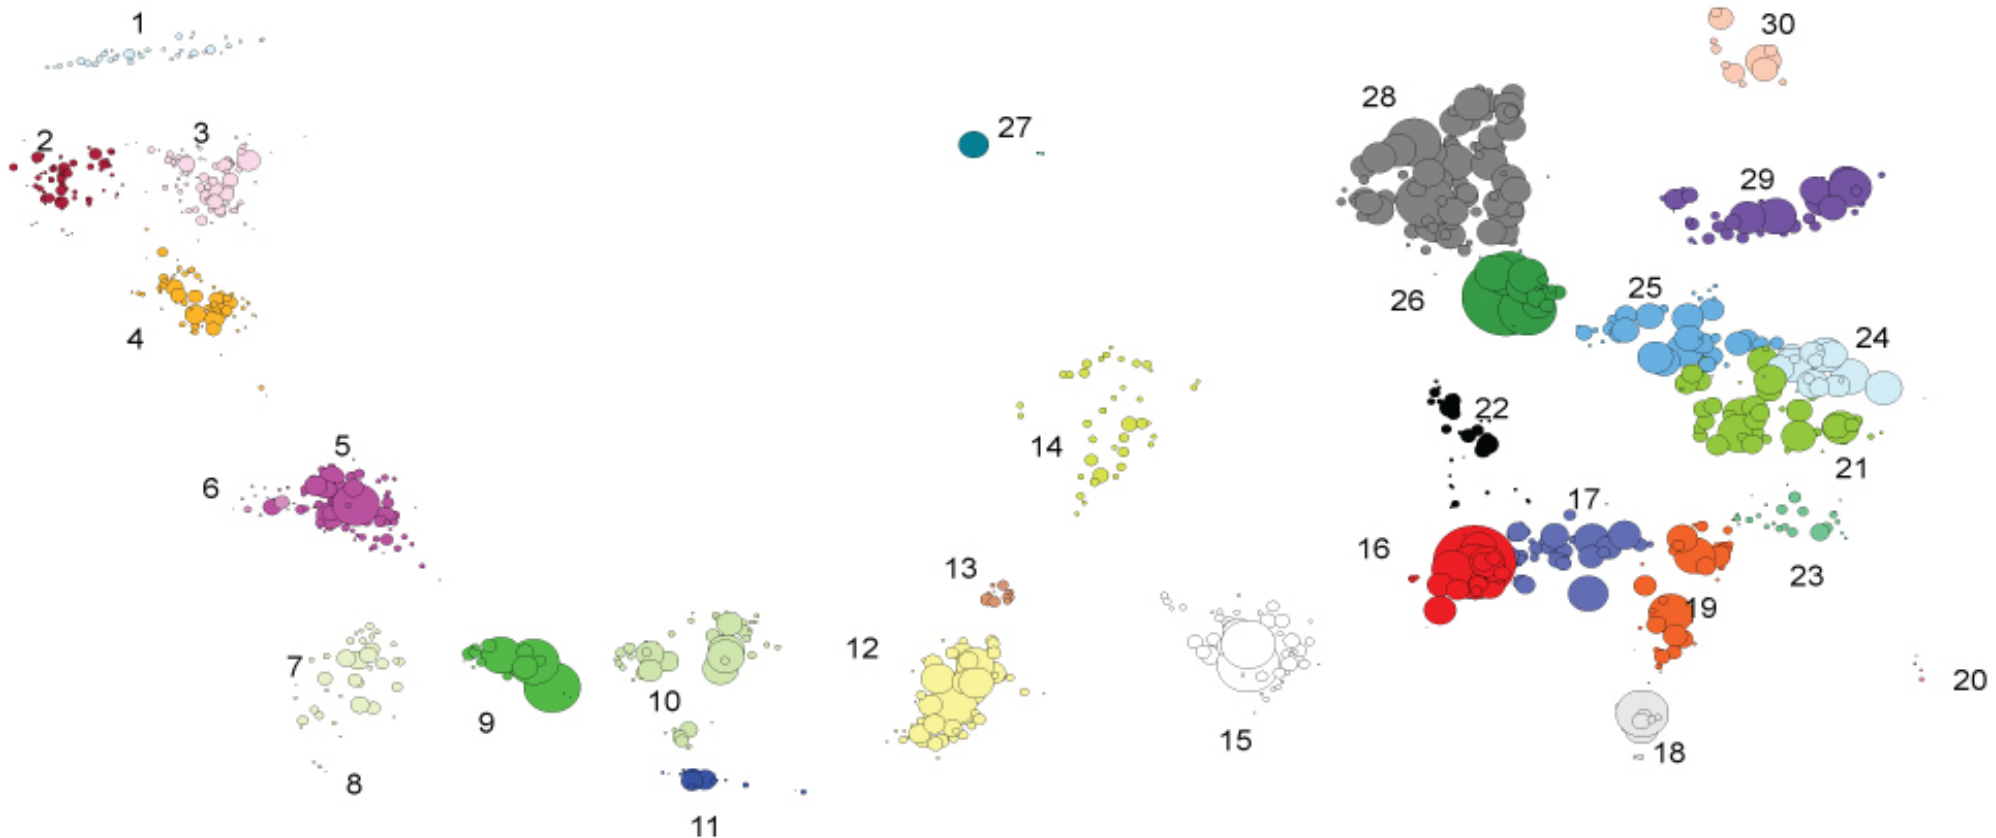

Legend  
Bubbles represent individual products (SKU's)  
Bubble color indicates submarket membership  
Bubble Size indicates global competitive asymmetry (consideration frequency)  
Submarkets are numbered 1 - 30

- Not a single LED-TV market: There are 30 submarkets, each dominated by a few products
- The strongest products overall (large bubbles) do not all directly compete against each other
- Competition is local to submarkets → **Managers must study individual submarkets to identify their strongest competitors**

# Zoom-In on a Submarket

Zoom-in on Submarket 15

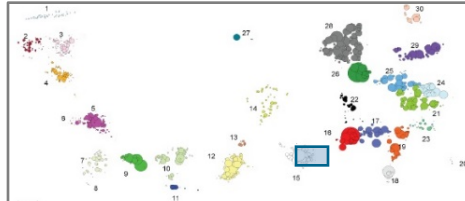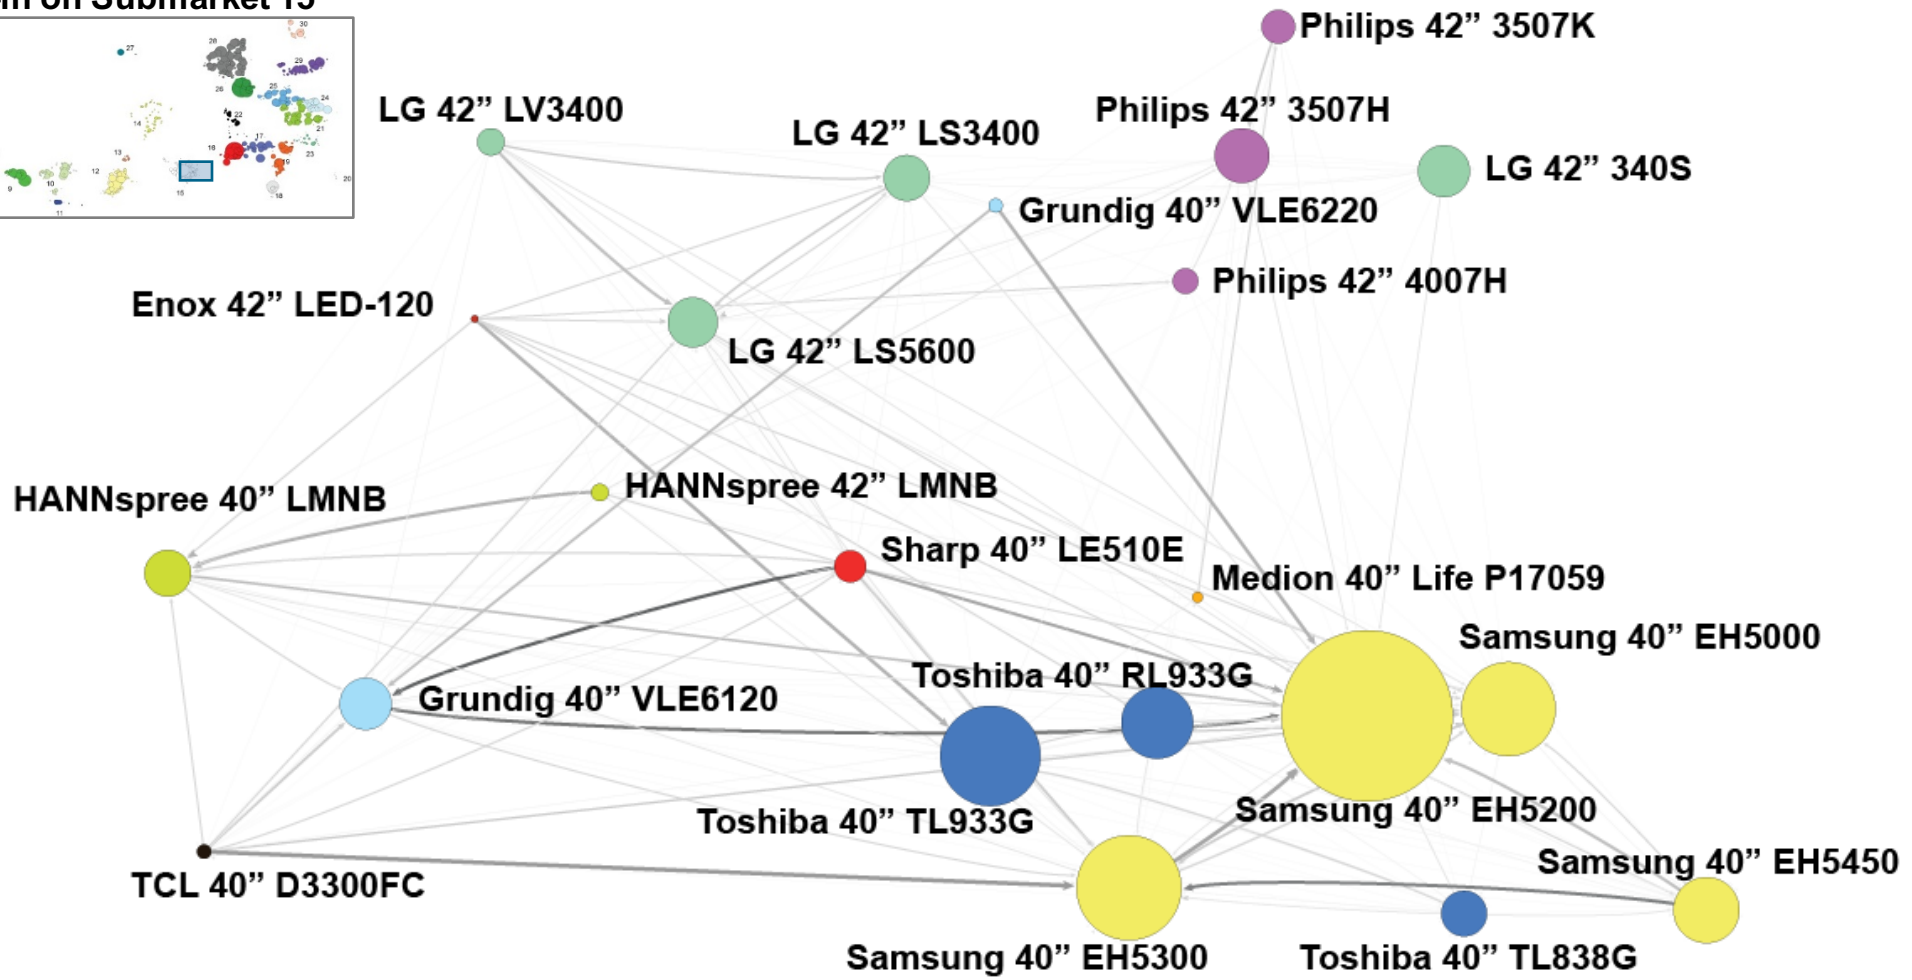

- Legend**
- Bubbles represent products
  - Bubble colors indicate brand
  - Bubble size indicates global competitive asymmetry (consideration frequency)
  - Arrows indicate local competitive asymmetry (point at competitor)
  - Arrow weight indicates intensity of competitive relationship (the heavier the arrow, the greater the competitive asymmetry)

# Zoom-In Further to Study Local Competitive Asymmetry

## Zoom-in on Submarket 15

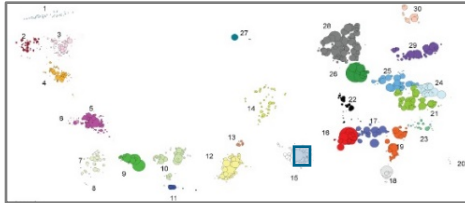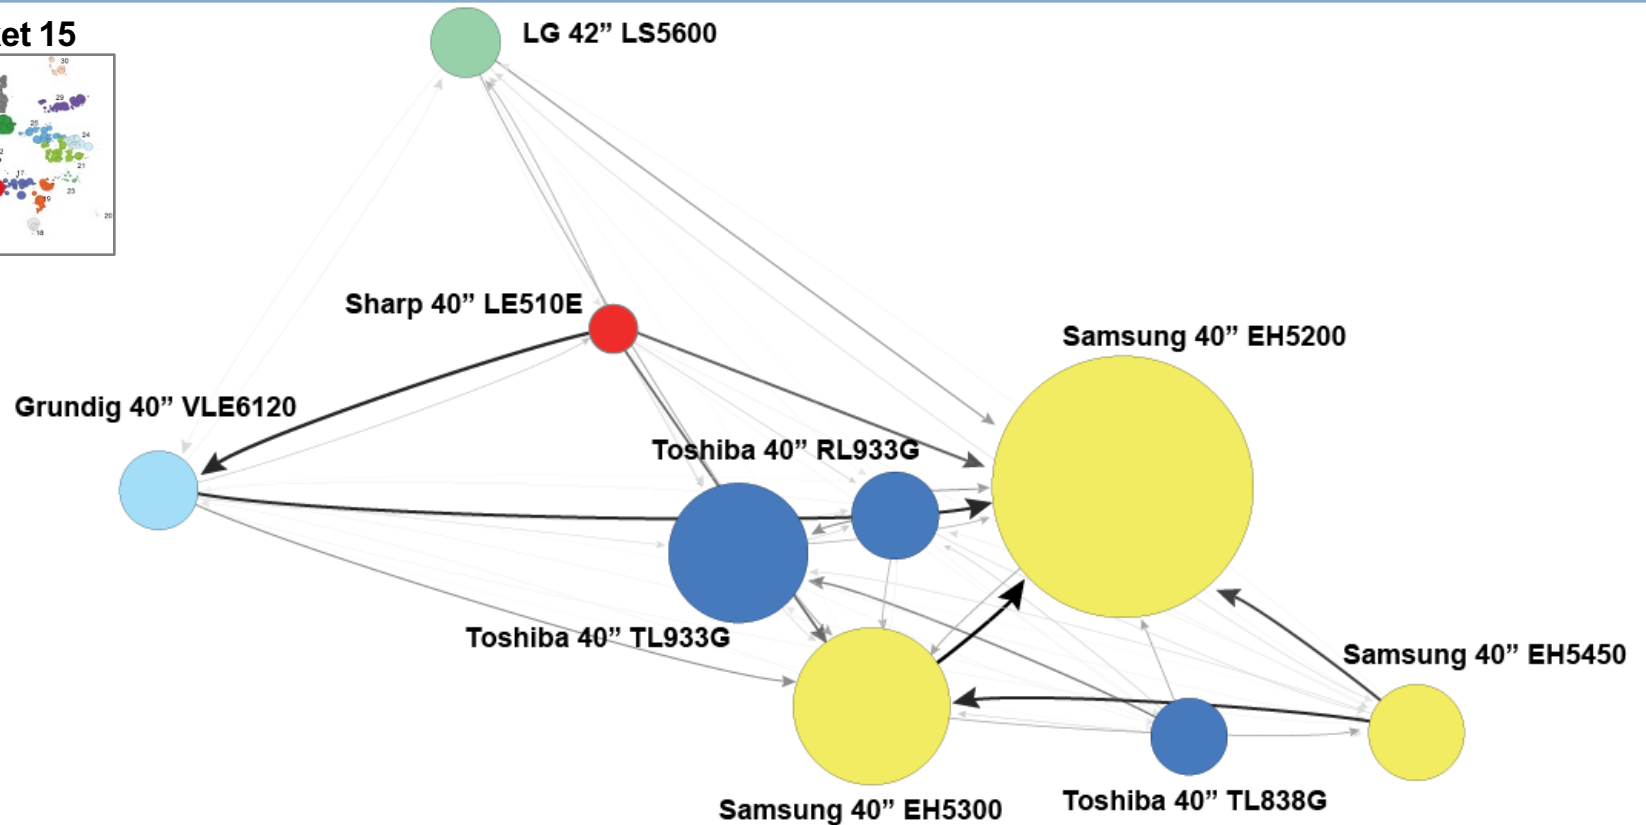

### Legend

Arrows indicate local competitive asymmetry (point at competitor)

Arrow weight indicates intensity of competitive relationship (the heavier the arrow, the greater the competitive asymmetry)

- ➔ Strongest overall competitor in a submarket (bubble size) not necessarily strongest competitor of a product:  
**Samsung 40" ED5200** not strongest competitor in terms of local competitive asymmetry (arrows) to **Sharp 40" LE510E**
- ➔ Closest competitors (by map distance) of a product not necessarily strongest competitors in terms of local competitive asymmetry (arrows): **Sharp 40" LE510E's** strongest competitor is **Grundig 40" VLE6120**, not its closest neighbors
- ➔ To correctly assess competition, managers must consider three things: (1) how close competitors are, (2) how strong competitors are overall, and (3) whether local competitive asymmetries are favorable or not

# Competitive Market Structure Map with Brand and Display Size

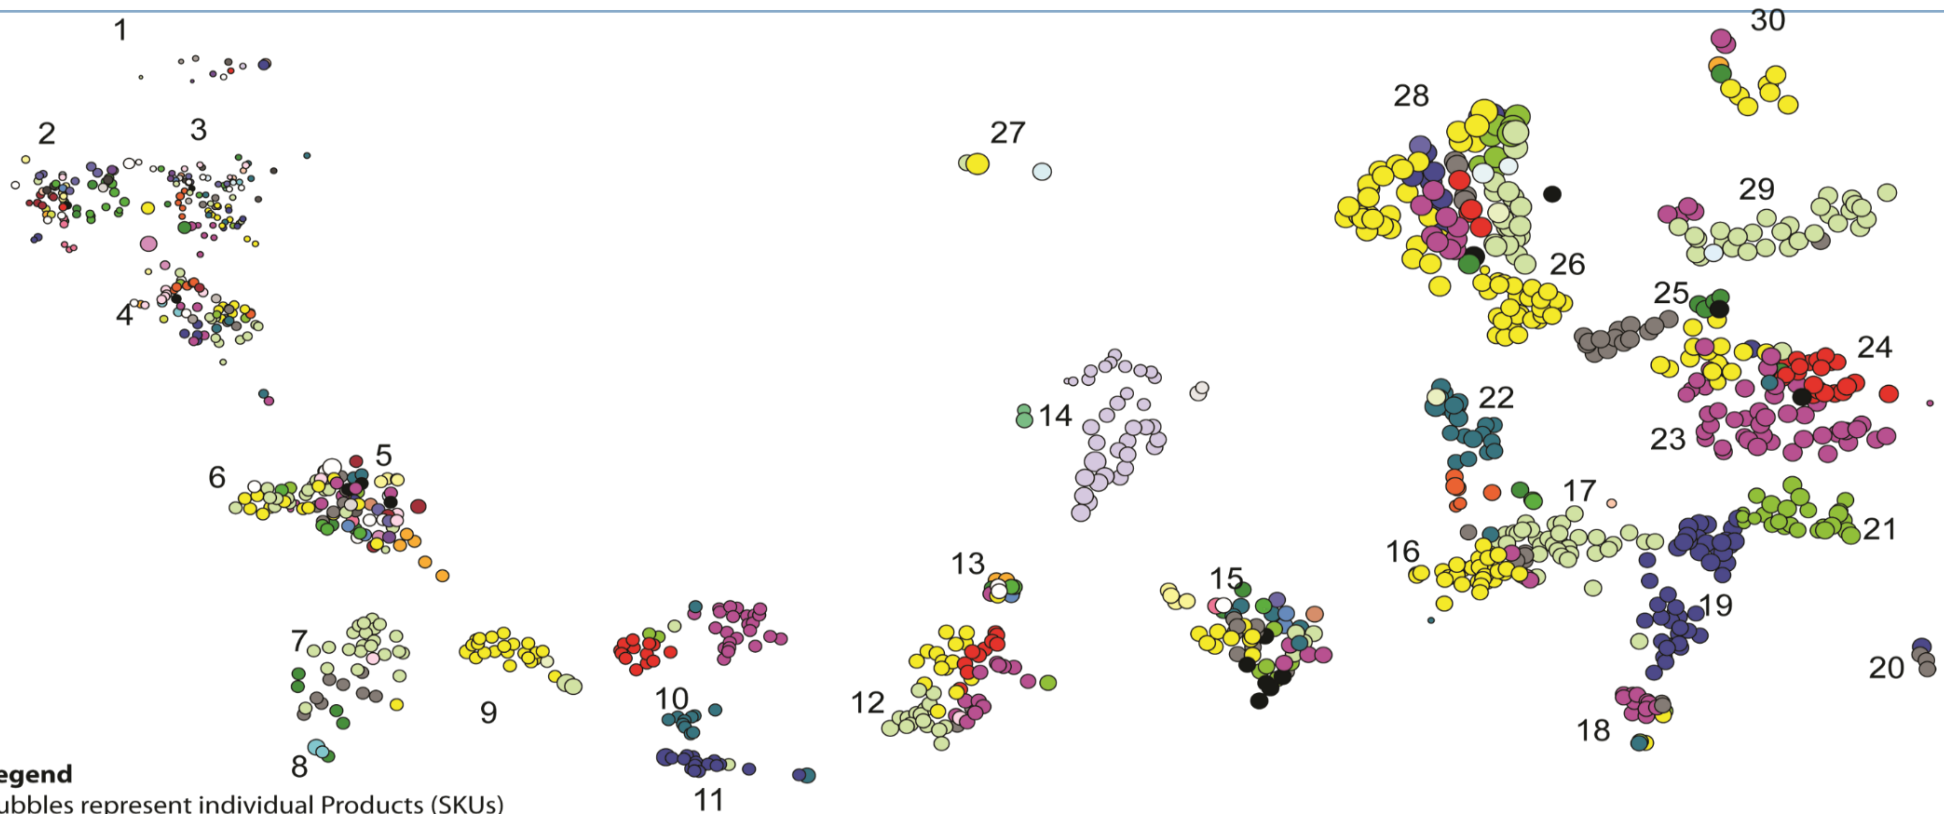

**Legend**  
 Bubbles represent individual Products (SKUs)  
 Bubble Color indicates Brand  
 Bubble Size indicates Display Size  
 Top 10 Brands by Market Share (GfK):  
 ● Samsung ● Philips ● LG ● Panasonic ● Sony ● Toshiba ● Sharp ● Grundig ● Loewe ● Telefunken

- ➔ Display size drives competitive market structure. Less known brands confined to smaller-display submarkets (left side of map) while top brands compete in larger-display submarkets (right side of map) → **Small brands must focus on launching larger display products to build market presence**
- ➔ Brands do not face same competitors (other brands) in all submarkets → **Managers must develop submarket-specific marketing strategies**
- ➔ Loewe isolation in separated submarket is early indication of later bankruptcy of Loewe → **Creating your “own market” is only good when you stay connected to full market in order to enter many consumer’s consideration sets**

# Competitive Market Structure Map with 3D Capability

Competitive market structure map for 1,124 LED-TVs

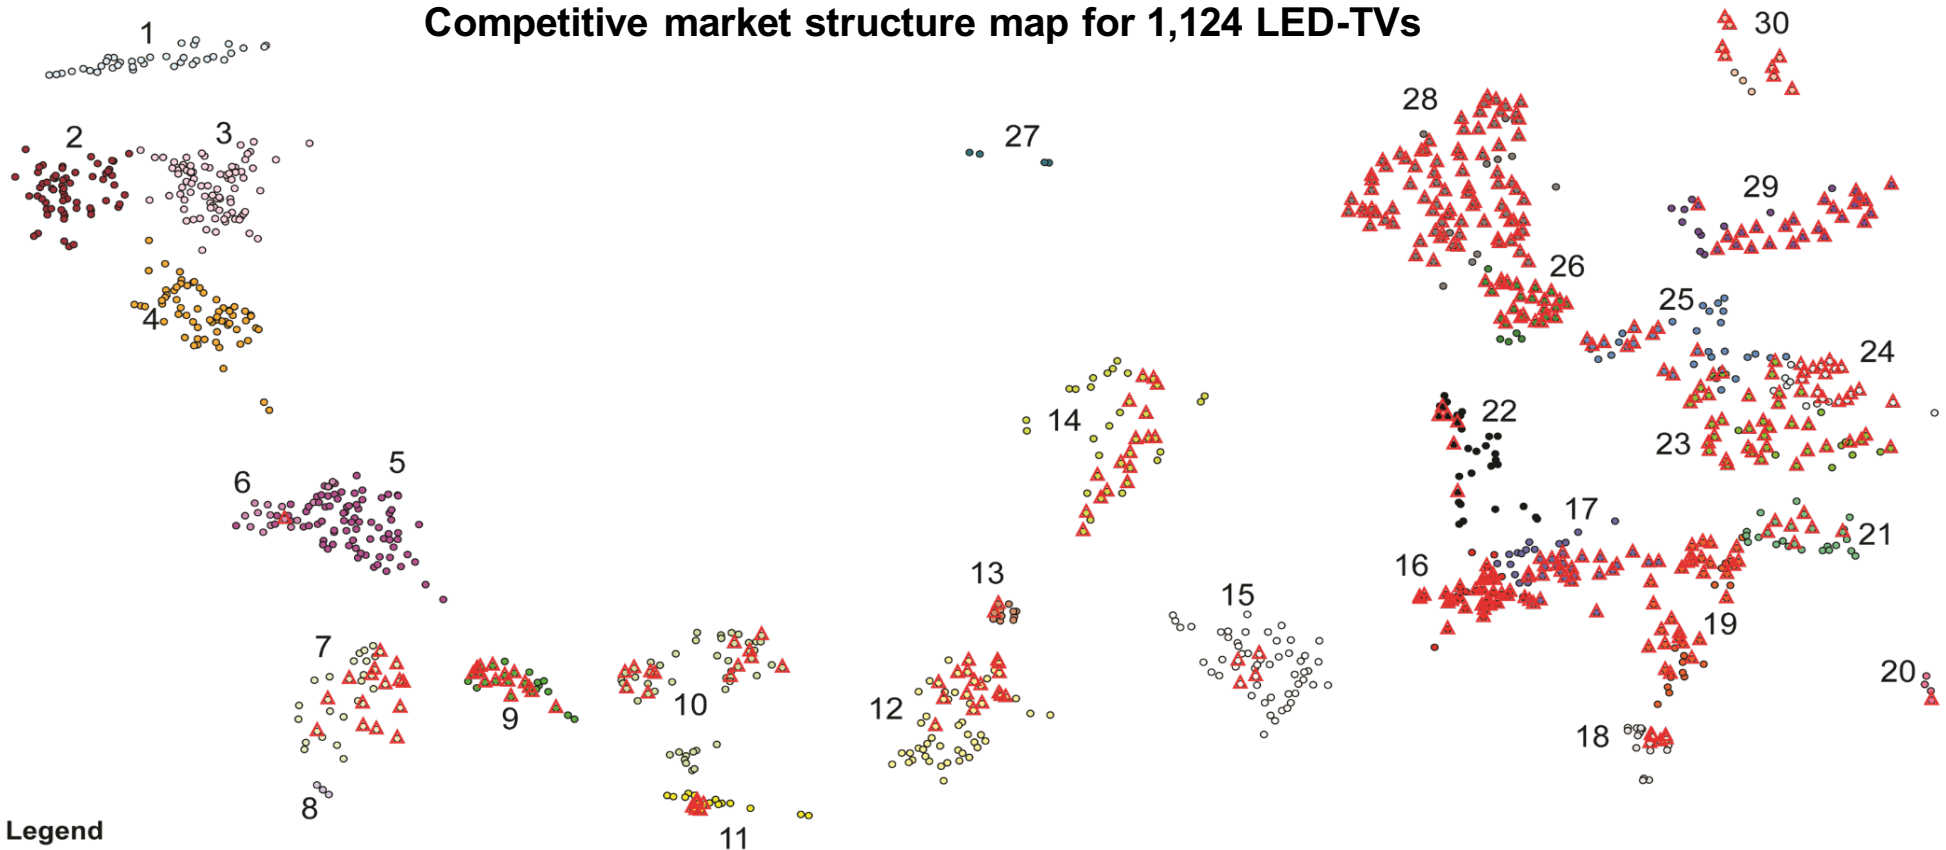

## Legend

- Bubbles represent individual products (SKUs)
- Bubble Color indicates submarket membership
- Red Triangles indicate 3D capability
- Submarkets are numbered 1 through 30

- 3D capability primarily among larger display LED-TVs
- 3D capability not a submarket defining product attribute
  - **Cannot break-down the problem of competitive market structure analysis to smaller, a priori defined markets such as 3D-TV's in order to employ traditional approaches for visualizing competitive market structure**

# Managerial Implications

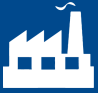

## Manufacturers

- Verify positioning: do products compete where intended?  
→ if not, adjust communication and pricing
- Explore which product attributes drive market structure (e.g., create new submarkets)  
→ focus R&D on key attributes
- Identify “spots” in the market with high consumer consideration but relatively few competitors  
→ design and position new products to capture market share in these “spots”
- Determine which competitors (product and brands) you face in each submarket  
→ align marketing activities towards specific competition in each submarket
- Determine impact of your marketing activities  
→ map market regularly and track changes in market share, position and competitive strength (i.e., competitive asymmetry)

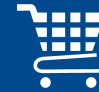

## Retailers

- Identify dominant products of each submarket  
→ serve all submarkets while listing less products
- Align inventory levels according to share of consideration (overall and within submarkets)
- When supply shortages of a product occur  
→ identify and temporarily switch to its closest competitor
- Balance brand assortment within submarkets  
→ reduce dependency on single manufacturers
- Determine which products in own inventory face strong (asymmetric) competitors  
→ clear before they become shelf-warmers
- Focus advertising on “hot” submarkets / products (those receiving most consideration) to draw consumers to your store (shop)

# Validation: Price-Comparison Site Data have higher External Validity than other Search Data

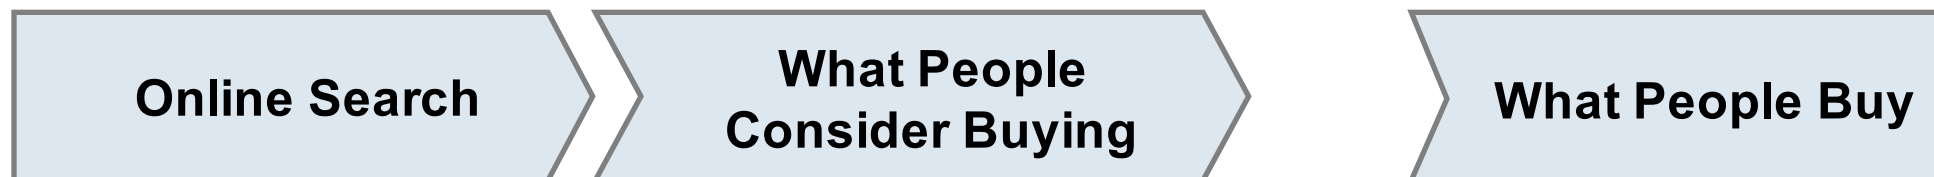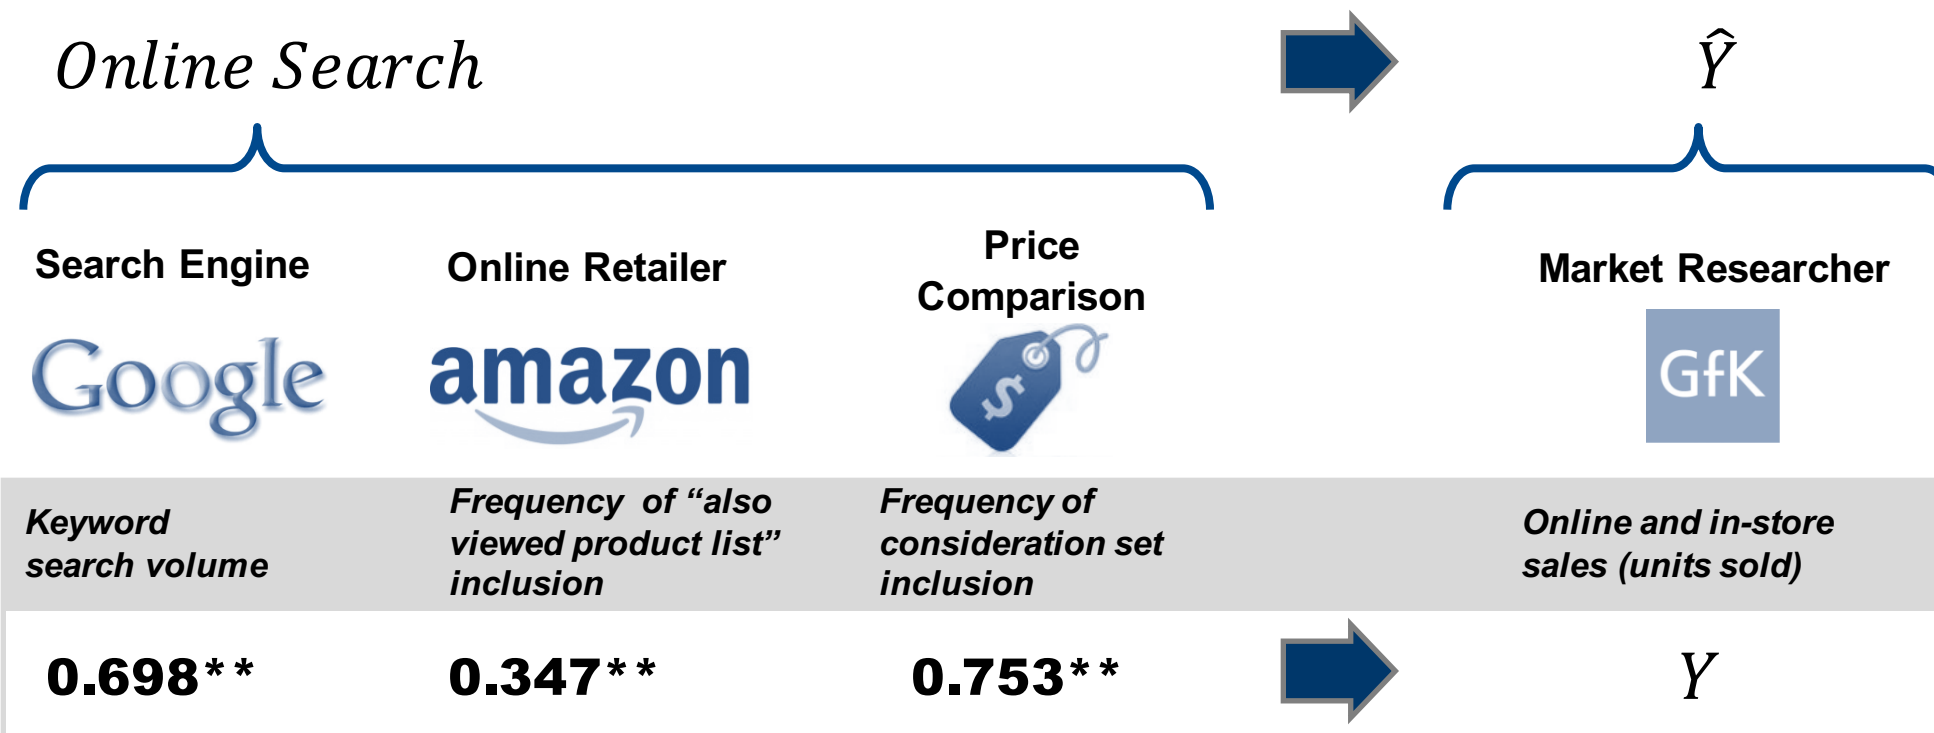

\*\* Correlation significant at 0.01 level (two-tailed); Sample consists of 549 LED-TV's (SKUs) matched across all data sources for September 2012 and covers 63% of total units sold according to GfK's Retailer Sales Panel

# Empirical Comparison: DRMABS clearly Outperforms Traditional Mapping Techniques

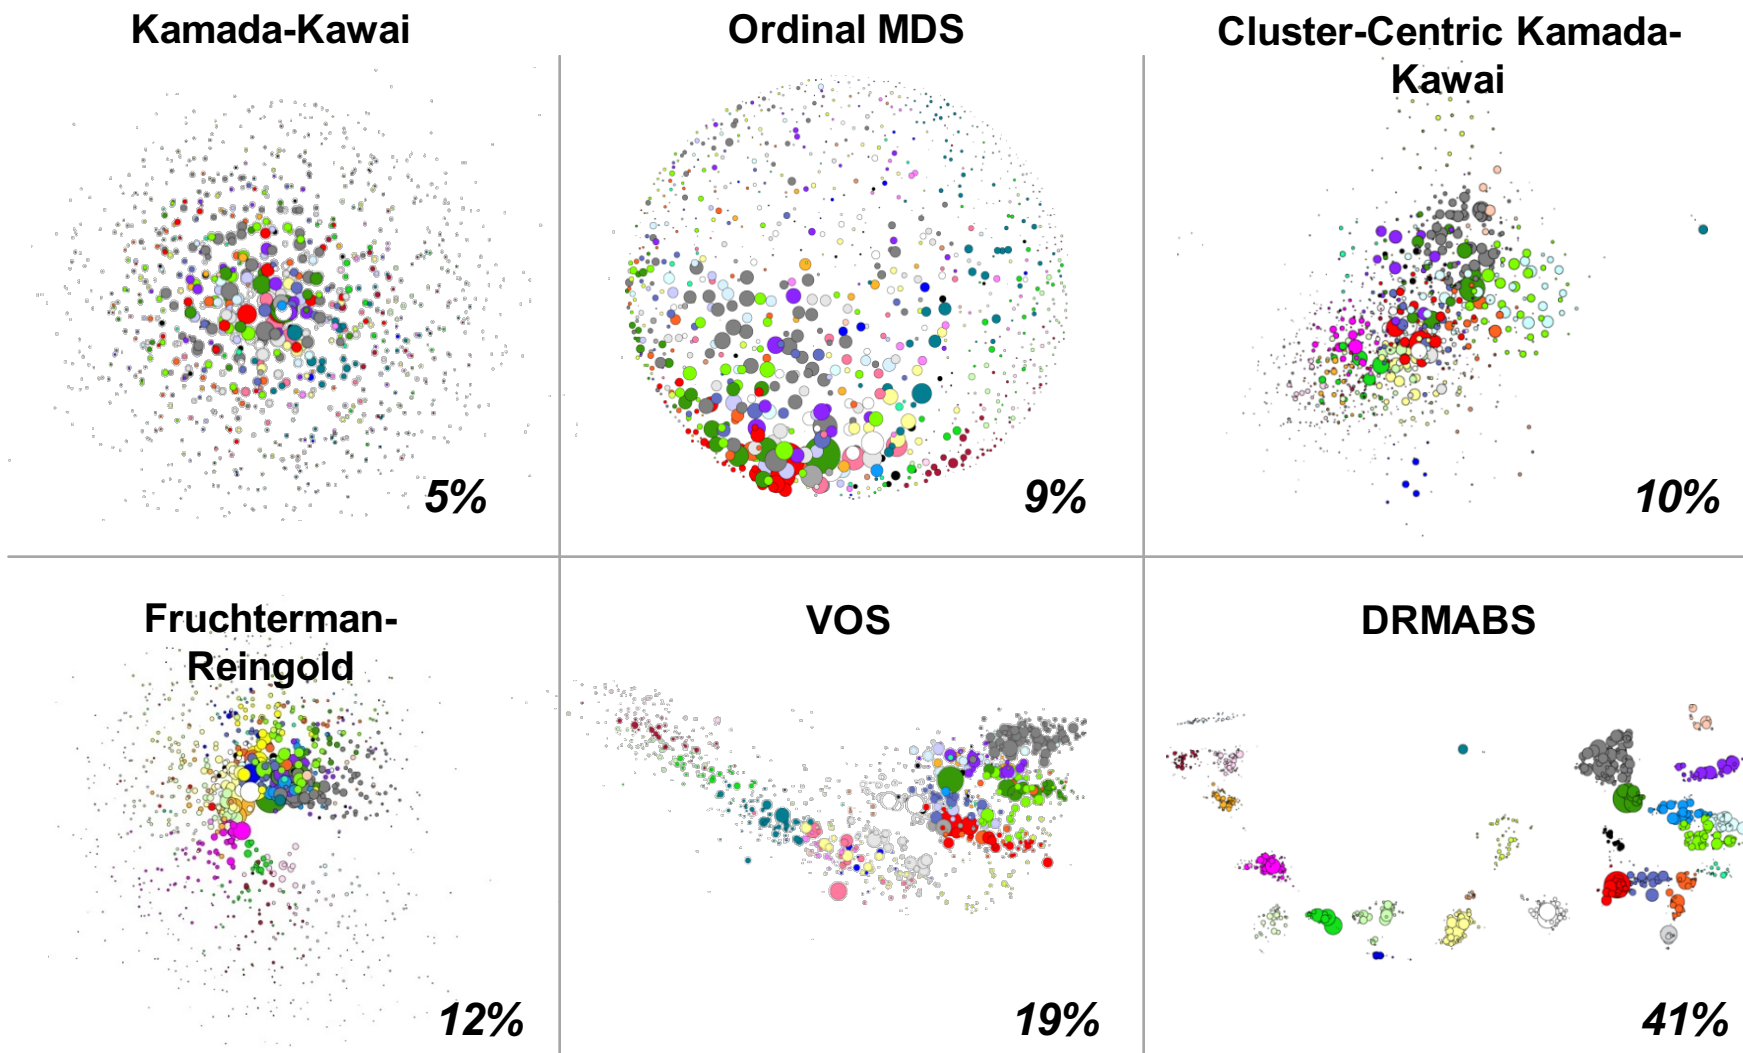

Bubble size indicates global competitive asymmetry (by consideration frequency)

Bubble color indicates submarket membership

Mean Top 10 Hit-Rate in % (tests whether products closest in map also have strongest competitive relations in Matrix of Joint Consideration)

# Call to Action

## **Look beyond traditional data sources when studying markets and competition:**

→ Online search data are rich, abundant and recorded by practically every webserver in the world

## **Use own search data or approach operators of websites that attract consumer search in your market of interest:**

→ Records of clickstreams are a byproduct when operating a website

→ Clickstreams can easily be extracted from existing server-logs

→ Even when you need to pay some money for such logs, the cost and time required for collecting data from thousands of consumers using traditional methods is a lot greater!

## **Use DRMABS as the starting point for understanding the competitive environment you face in large markets:**

→ From there, drill down in areas that catch your attention to gain new insights

→ Develop informed and directed marketing activities given the competitors you face

→ Investigate the impact of your activities by employing DRMABS regularly (i.e., over time)
